# Supplementary material for: Registry-Based Retrospective Cohort Study of Mortality among Adults Admitted to Intensive Care Units in Istanbul with Hospital Acquired Pseudomonas aeruginosa Bloodstream-Infection between 2014–2021
Source: MDPI journal article supplement (doi:10.3390/antibiotics13010090), 2024-01-17
Supplement: s1 [file s1]

# Supplementary Materials

## S-1: Definitions of EUCAST breakpoint table update: “Susceptible, increased exposure”

"6. EUCAST breakpoints are used to categorize results into three susceptibility categories:

**S - Susceptible, standard dosing regimen:** A microorganism is categorized as Susceptible, standard dosing regimen, when there is a high likelihood of therapeutic success using a standard dosing regimen of the agent.

**I - Susceptible, increased exposure:** A microorganism is categorized as Susceptible, increased exposure\* when there is a high likelihood of therapeutic success because exposure to the agent is increased by adjusting the dosing regimen or by its concentration at the site of infection.

**R - Resistant:** A microorganism is categorized as Resistant when there is a high likelihood of therapeutic failure even when there is increased exposure.

\*Exposure is a function of how the mode of administration, dose, dosing interval, infusion time, as well as distribution and excretion of the antimicrobial agent will influence the infecting organism at the site of infection."

[https://www.eucast.org/clinical\\_breakpoints](https://www.eucast.org/clinical_breakpoints)

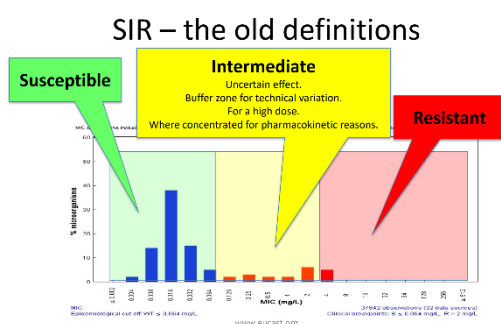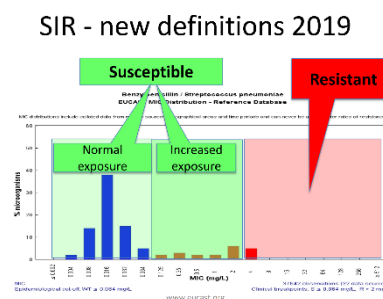

## S-2: Definitions for the Study Sample

| Table 1. Definitions*       |                                                                                                                                                                                                                                                                            |
|-----------------------------|----------------------------------------------------------------------------------------------------------------------------------------------------------------------------------------------------------------------------------------------------------------------------|
| Bloodstream infection[1]    | A laboratory-confirmed positive blood culture with PSA that may be the result of an infection at another body site (secondary BSI) or not (primary BSI)                                                                                                                    |
| Polymicrobial blood culture | Detection of one or more microorganisms other than PSA in the same sample                                                                                                                                                                                                  |
| Neutropenia                 | A granulocyte count < 500 cells/μL or < 1000 cells/μL with an expected decline greater than or equal to 500 cells/μL over the next 48 hours[2]                                                                                                                             |
| Acute Kidney Injury         | Increase in serum creatinine by ≥0.3 mg/dL (≥26.5 micromole/L) within 48 hours, or<br>Increase in serum creatinine to ≥1.5 times baseline, which is known or presumed to have occurred within the prior seven days,<br>or<br>Urine volume <0.5 mL/kg/hour for six hours[3] |

|                                |                                                                                                                                                                                                                                                                                                                                                                                    |
|--------------------------------|------------------------------------------------------------------------------------------------------------------------------------------------------------------------------------------------------------------------------------------------------------------------------------------------------------------------------------------------------------------------------------|
| Antimicrobial breakpoints[4,5] | CLSI or EUCAST guidelines applicable to the year of admission were utilized.                                                                                                                                                                                                                                                                                                       |
| Carbapenem-resistant           | Any isolate that tested (R) to at least 1 of these: imipenem, meropenem                                                                                                                                                                                                                                                                                                            |
| Aminoglycoside-resistant       | Any isolate that tested (R) to at least 1 of these: amikacin, gentamicin, tobramycin                                                                                                                                                                                                                                                                                               |
| Difficult-to-Treat[6,7]        | Intermediate or resistant to all reported agents in carbapenem, $\beta$ -lactam, and fluoroquinolone categories (including additional agents when results available)                                                                                                                                                                                                               |
| Multidrug Resistant[8]         | Any isolate that tested (R) to at least 1 drug in at least 3 of these categories:<br>1. Extended spectrum cephalosporins (ceftazidime, cefepime)<br>2. Fluoroquinolones (ciprofloxacin, levofloxacin)<br>3. Aminoglycosides (amikacin, gentamicin, tobramycin)<br>4. Carbapenems (imipenem, meropenem, doripenem)<br>5. Piperacillin Group (piperacillin, piperacillin/tazobactam) |
| Empiric therapy                | Antibiotic treatment administered in the event of a suspected infection prior to the availability of microbiology results                                                                                                                                                                                                                                                          |
| Directed therapy               | Antibiotic therapy administered for BSI in accordance with available microbiology results                                                                                                                                                                                                                                                                                          |
| Periods                        | Period 1: 2014-2019<br>Period 2: 2020-2021                                                                                                                                                                                                                                                                                                                                         |

Definitions was modified according to EUCAST definitions after 2019

- [1] Hall, K.K.; Lyman, J.A. Updated Review of Blood Culture Contamination. Clin. Microbiol. Rev. **2006**, *19*, 788–802, <https://doi.org/10.1128/cmr.00062-05>
- [2] Freifeld, A.G.; Bow, E.J.; Sepkowitz, K.A.; Boeckh, M.J.; Ito, J.I.; Mullen, C.A.; Raad, I.I.; Rolston, K.V.; Young, J.-A.H.; Wingard, J.R. Clinical Practice Guideline for the Use of Antimicrobial Agents in Neutropenic Patients with Cancer: 2010 Update by the Infectious Diseases Society of America. Clin. Infect. Dis. **2011**, *52*, e56–e93, <https://doi.org/10.1093/cid/cir073>
- [3] Kellum, J.A.; Lameire, N.; Aspelin, P.; Barsoum, R.S.; Burdmann, E.A.; Goldstein, S.L.; Herzog, C.A.; Joannidis, M.; Kribben, A.; Levey, A.S.; et al. Improving global outcomes (KDIGO) acute kidney injury work group. KDIGO clinical practice guideline for acute kidney injury. Kidney Int. Suppl. **2012**, *2*, 1–138, doi:<https://doi.org/10.1038/kisup.2012.1>.
- [4] The European Committee on Antimicrobial Susceptibility Testing. Breakpoint Tables for Interpretation of MICs and Zone Diameters, Version 10.0, 2020, 0–77. Available online: [http://www.eucast.org/clinical\\_breakpoints](http://www.eucast.org/clinical_breakpoints) (accessed January 20, 2023).
- [5] Clinical & Laboratory Standards Institute: CLSI Guidelines n.d. <https://clsi.org/> (accessed January 20, 2023).
- [6] Tamma, P.D.; Aitken, S.L.; Bonomo, R.A.; Mathers, A.J.; van Duin, D.; Clancy, C.J. Infectious Diseases Society of America Guidance on the Treatment of Extended-Spectrum  $\beta$ -Lactamase Producing Enterobacterales (ESBL-E), Carbapenem-Resistant Enterobacterales (CRE), and Pseudomonas Aeruginosa with Difficult-to-Treat Resistance (DTR-P. Aeruginosa). Clin. Infect. Dis. **2021**, *72*, e169–e183. <https://doi.org/10.1093/CID/CIAA1478>.
- [7] Kadri, S.S.; Adjemian, J.; Lai, Y.L.; Spaulding, A.B.; Ricotta, E.; Prevots, D.R.; Palmore, T.N.; Rhee, C.; Klompas, M.; Dekker, J.P.; et al. Difficult-to-Treat Resistance in Gram-negative Bacteremia at 173 US Hospitals: Retrospective Cohort Analysis of Prevalence, Predictors, and

Outcome of Resistance to All First-line Agents. Clin. Infect. Dis. 2018, 67, 1803–1814, doi:10.1093/cid/ciy378.

- [8] Rossolini, G.M.; Bochenska, M.; Fumagalli, L.; Dowzicky, M. Trends of major antimicrobial resistance phenotypes in entero-bacterales and gram-negative non-fermenters from ATLAS and EARS-net surveillance systems: Italian vs. European and global data, 2008-2018. Diagn. Microbiol. Infect. Dis. 2021, 101, 115512, <https://doi.org/10.1016/j.diagmicrobio.2021.115512>.

### S-3: ROC analysis of laboratory data and creating dummy variables.

Finding cutoff values for crp\_72\_0, pct\_72\_0 and neut\_24\_0

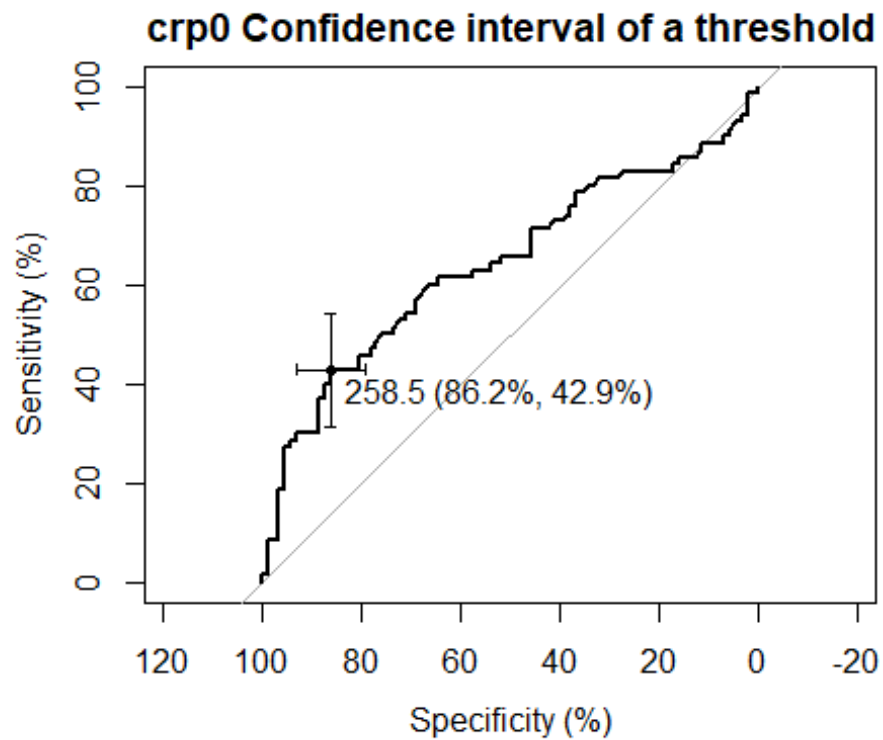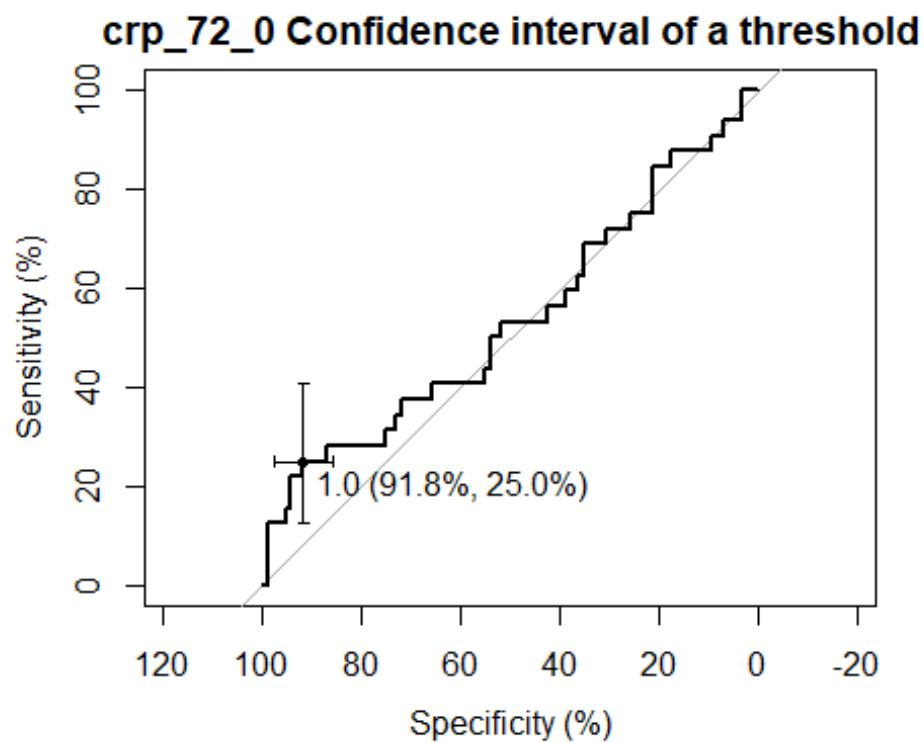

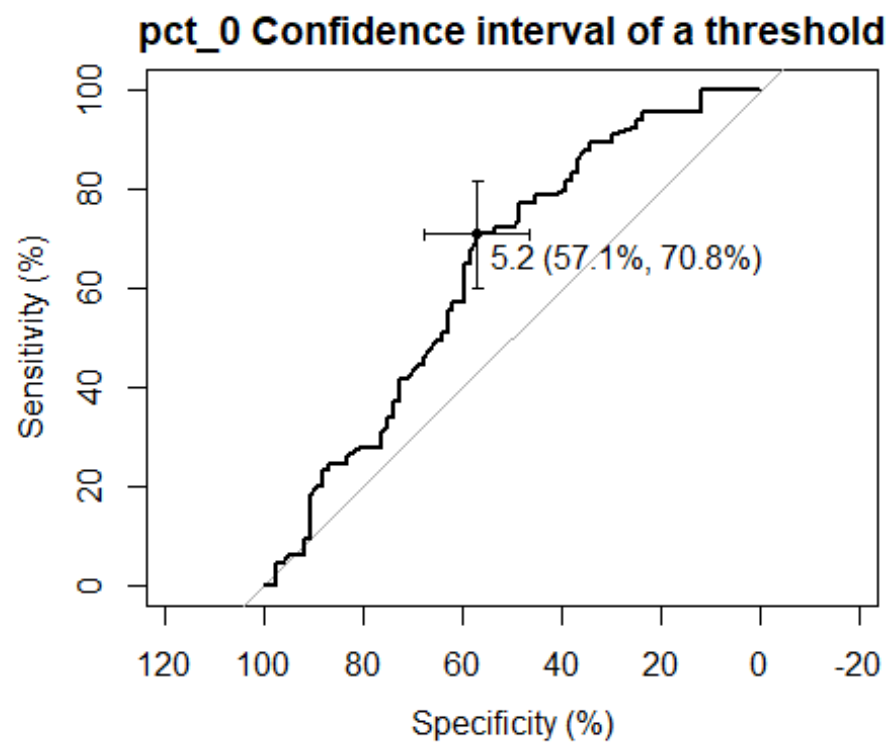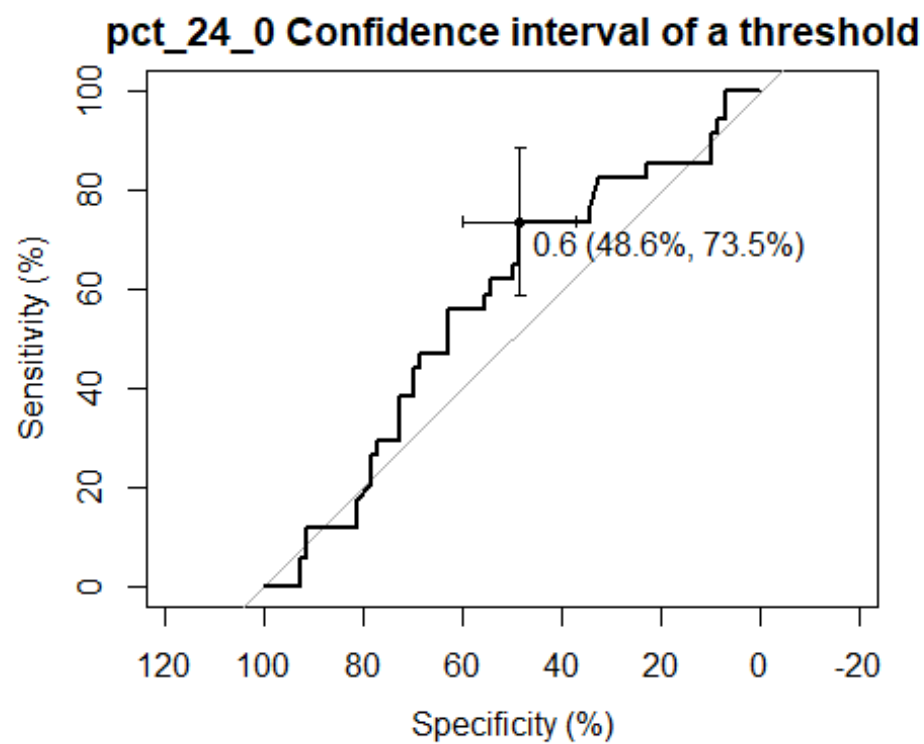

**pct\_72\_0 Confidence interval of a threshold**

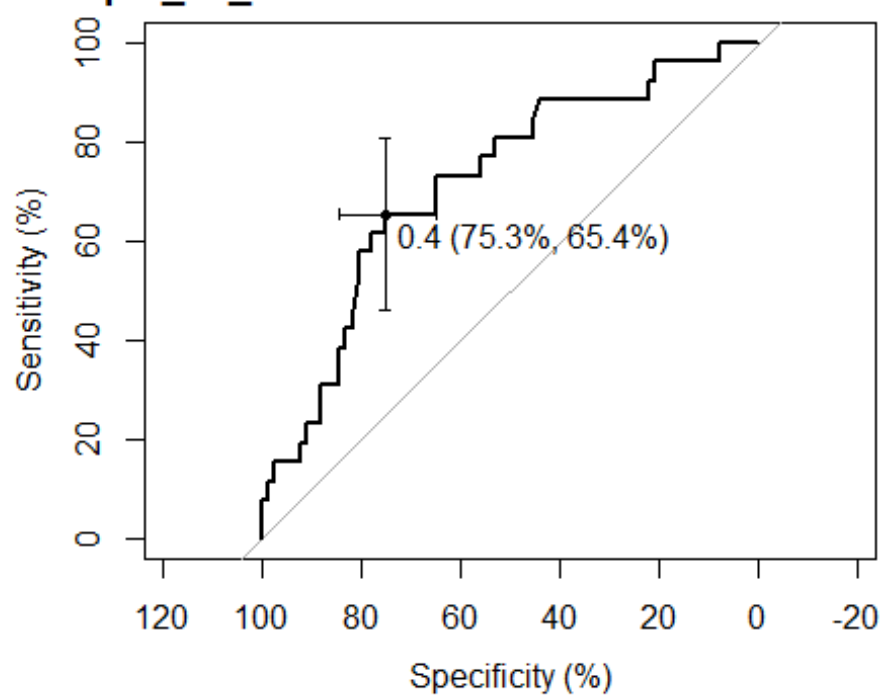

**Neut\_24\_0 Confidence interval of a threshold**

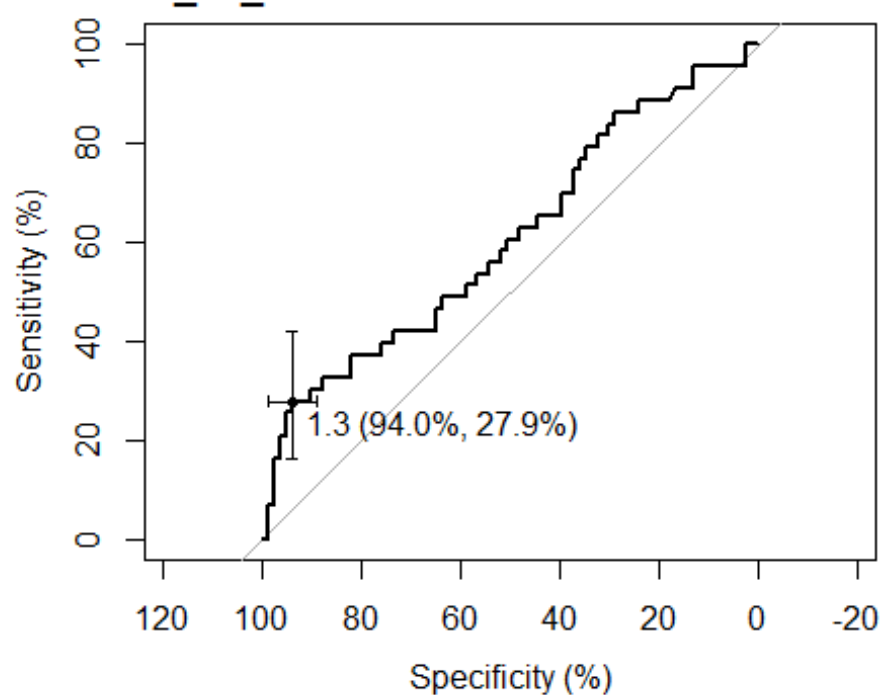

## S-4: Cox Proportional Hazard Model goodness of fit analysis results

## n= 148, number of events= 61 , ## (9 observations deleted due to missingness)

## ##

**## E-Table 1: Cox Model Proportional Hazards Model**

|                       | exp(coef) | exp(-coef) | lower .95 | upper .95 |
|-----------------------|-----------|------------|-----------|-----------|
| mono_combiCombination | 0.6168    | 1.6212     | 0.3114    | 1.222     |
| age                   | 0.9979    | 1.0021     | 0.9776    | 1.019     |
| cci                   | 1.1758    | 0.8505     | 1.0542    | 1.311     |
| genderMale            | 0.9891    | 1.0111     | 0.5599    | 1.747     |
| PeriodPeriod 2        | 2.1750    | 0.4598     | 1.1407    | 4.147     |
| DTRDTR                | 0.6280    | 1.5923     | 0.2583    | 1.527     |
| MDRMDR                | 2.4893    | 0.4017     | 1.2494    | 4.960     |
| sourcePimary          | 2.0828    | 0.4801     | 1.1245    | 3.858     |
| crp_0                 | 1.0020    | 0.9980     | 0.9997    | 1.004     |
| plt_lower_100Yes      | 6.9167    | 0.1446     | 3.3199    | 14.411    |
| akiYes                | 2.6393    | 0.3789     | 1.3680    | 5.092     |

Concordance= 0.792 (se = 0.028 )

Likelihood ratio test= 66.01 on 11 df, p=0.000000007

Wald test = 53.82 on 11 df, p=0.0000001

Score (logrank) test = 70.67 on 11 df, p=0.0000000009

AIC= 381

**## E-Table 3: Cox Model Proportional Hazards Assumption Test**

|            | chisq  | df | p     |
|------------|--------|----|-------|
| mono_combi | 0.3659 | 1  | 0.545 |
| age        | 0.5397 | 1  | 0.463 |
| cci        | 0.0511 | 1  | 0.821 |
| gender     | 0.0785 | 1  | 0.779 |
| Period     | 0.6620 | 1  | 0.416 |
| DTR        | 1.9585 | 1  | 0.162 |
| MDR        | 4.6594 | 1  | 0.031 |
| source     | 0.5369 | 1  | 0.464 |
| crp_0      | 0.0196 | 1  | 0.889 |

|               |         |    |       |
|---------------|---------|----|-------|
| plt_lower_100 | 2.2264  | 1  | 0.136 |
| aki           | 2.5342  | 1  | 0.111 |
| GLOBAL        | 10.8365 | 11 | 0.457 |

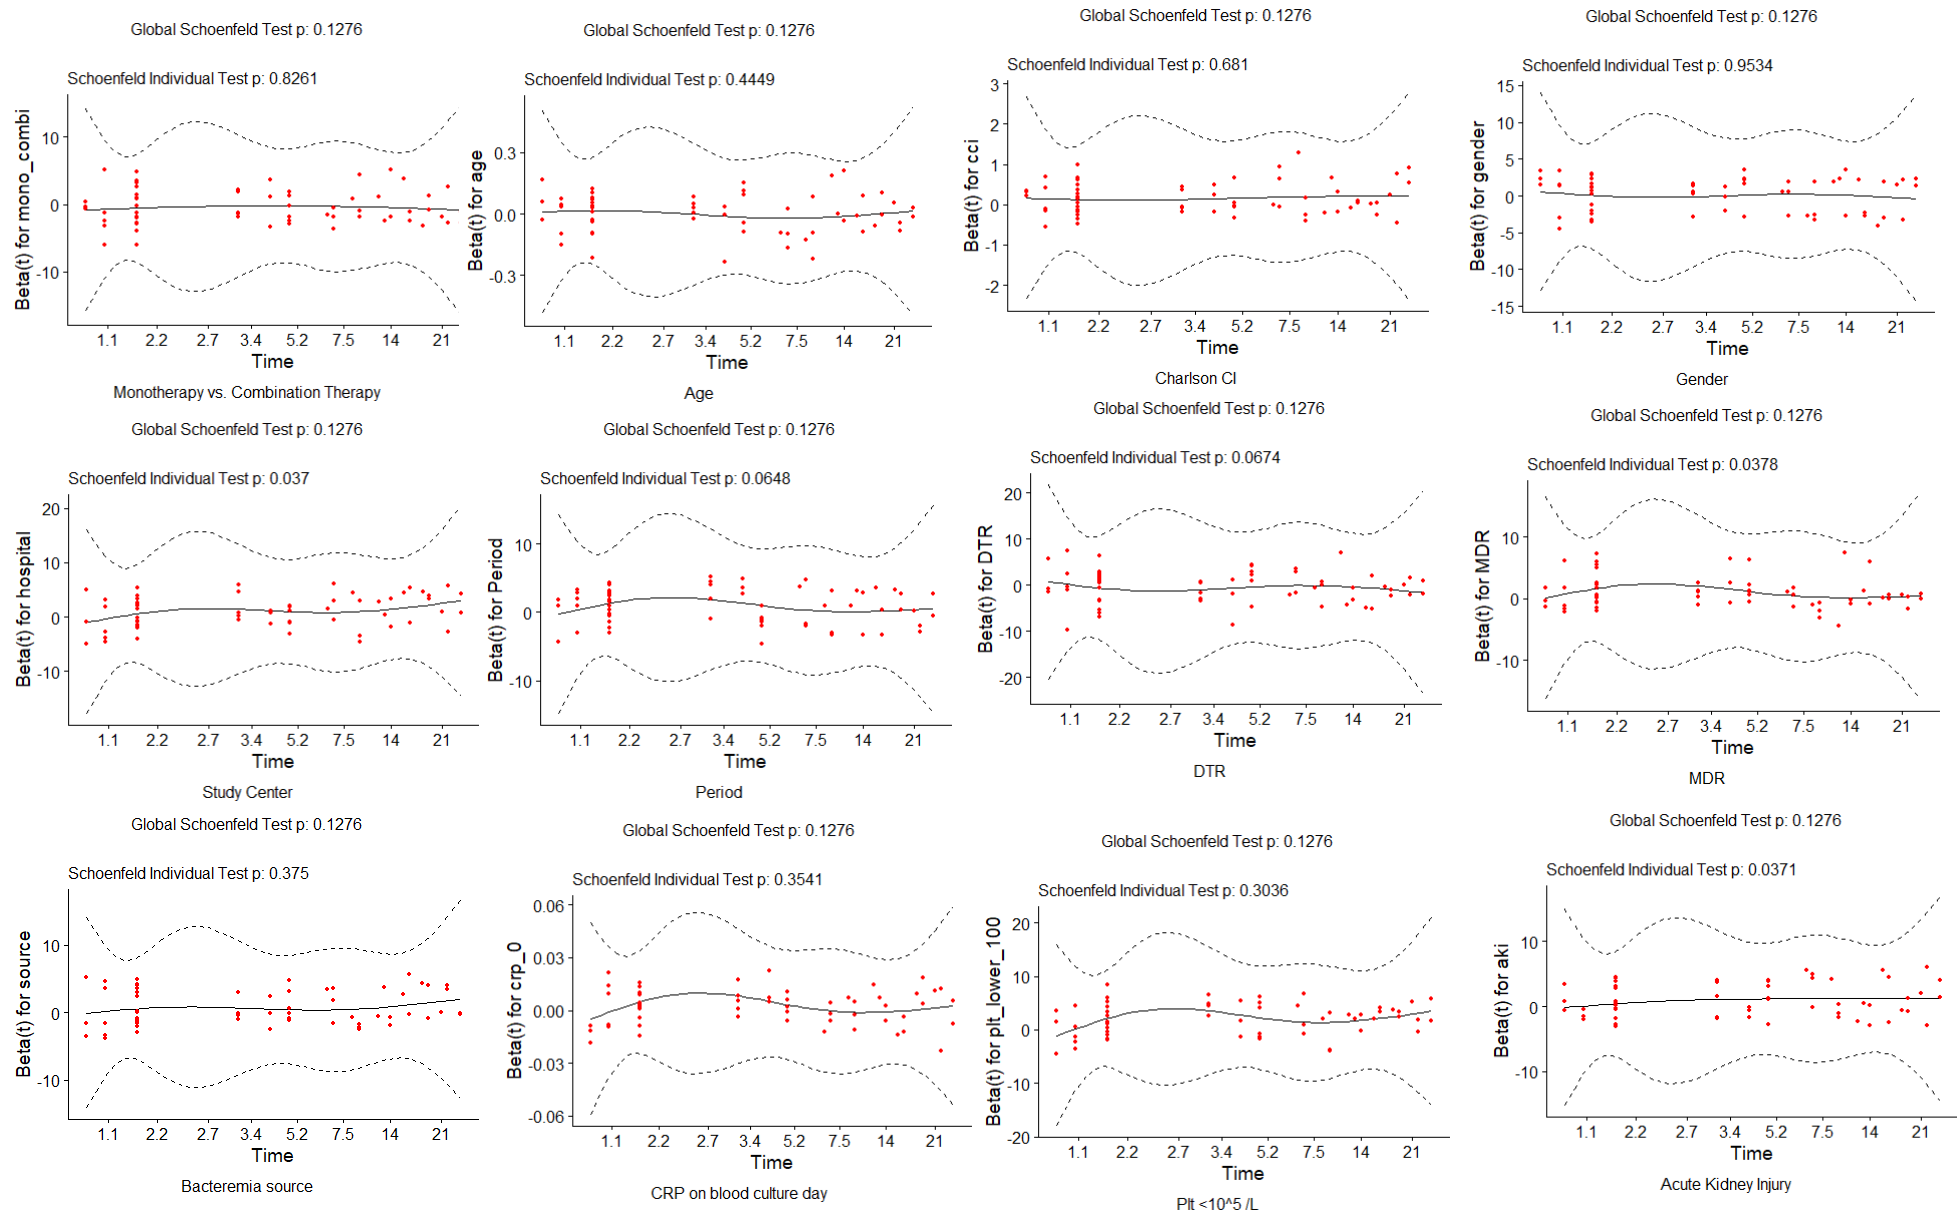

## S-5: Subclassifications of BSI source by period 1 and 2

| Characteristic    | Period 1, N = 84 <sup>1</sup> | Period 2, N = 73 <sup>1</sup> | p-value <sup>2</sup> |
|-------------------|-------------------------------|-------------------------------|----------------------|
| Bacteremia Source |                               |                               | 0.3                  |
| Primary           | 23 (27%)                      | 22 (30%)                      |                      |
| Complicated UTI   | 9 (11%)                       | 4 (5.5%)                      |                      |
| Pneumonia         | 21 (25%)                      | 18 (25%)                      |                      |
| Hepatobiliary     | 7 (8.3%)                      | 2 (2.7%)                      |                      |
| Catheter Inf      | 19 (23%)                      | 25 (34%)                      |                      |
| Complicated SSTI  | 5 (6.0%)                      | 2 (2.7%)                      |                      |

<sup>1</sup>n (%)

<sup>2</sup>Fisher's exact test

## S-6 Multiple Stratification and Analysis of Outcome by Period and Resistance Type

| Characteristic             | Period 1, N = 84        |                          |                           |                      | Period 2, N = 73         |                         |                           |                      |
|----------------------------|-------------------------|--------------------------|---------------------------|----------------------|--------------------------|-------------------------|---------------------------|----------------------|
|                            | DTR, N = 9 <sup>1</sup> | MDR, N = 13 <sup>1</sup> | None, N = 62 <sup>1</sup> | p-value <sup>2</sup> | DTR, N = 28 <sup>1</sup> | MDR, N = 4 <sup>1</sup> | None, N = 41 <sup>1</sup> | p-value <sup>2</sup> |
| <b>Outcome</b>             |                         |                          |                           | 0.2                  |                          |                         |                           | 0.3                  |
| Recover                    | 4 (8.5%)                | 5 (11%)                  | 38 (81%)                  |                      | 18 (45%)                 | 1 (2.5%)                | 21 (53%)                  |                      |
| Death                      | 5 (14%)                 | 8 (22%)                  | 24 (65%)                  |                      | 10 (30%)                 | 3 (9.1%)                | 20 (61%)                  |                      |
| <b>Ventilation support</b> |                         |                          |                           | 0.070                |                          |                         |                           | 0.9                  |
| Nasal                      | 1 (10%)                 | 0 (0%)                   | 9 (90%)                   |                      | 0 (0%)                   | 0 (0%)                  | 1 (100%)                  |                      |
| NIMV                       | 4 (31%)                 | 2 (15%)                  | 7 (54%)                   |                      | 3 (50%)                  | 0 (0%)                  | 3 (50%)                   |                      |
| MV                         | 4 (6.6%)                | 11 (18%)                 | 46 (75%)                  |                      | 25 (38%)                 | 4 (6.1%)                | 37 (56%)                  |                      |
| <b>Bacteremia Source</b>   |                         |                          |                           | 0.2                  |                          |                         |                           | 0.3                  |
| Primary                    | 1 (4.3%)                | 3 (13%)                  | 19 (83%)                  |                      | 6 (27%)                  | 2 (9.1%)                | 14 (64%)                  |                      |
| Complicated UTI            | 0 (0%)                  | 4 (44%)                  | 5 (56%)                   |                      | 3 (75%)                  | 0 (0%)                  | 1 (25%)                   |                      |
| Pneumonia                  | 3 (14%)                 | 1 (4.8%)                 | 17 (81%)                  |                      | 9 (50%)                  | 2 (11%)                 | 7 (39%)                   |                      |
| Hepatobiliary              | 1 (14%)                 | 2 (29%)                  | 4 (57%)                   |                      | 1 (50%)                  | 0 (0%)                  | 1 (50%)                   |                      |
| Catheter Inf               | 3 (16%)                 | 3 (16%)                  | 13 (68%)                  |                      | 9 (36%)                  | 0 (0%)                  | 16 (64%)                  |                      |
| Complicated SSTI           | 1 (20%)                 | 0 (0%)                   | 4 (80%)                   |                      | 0 (0%)                   | 0 (0%)                  | 2 (100%)                  |                      |

| Characteristic | Period 1, N = 84           |                             |                              |                          | Period 2, N = 73            |                            |                              |                          |
|----------------|----------------------------|-----------------------------|------------------------------|--------------------------|-----------------------------|----------------------------|------------------------------|--------------------------|
|                | DTR, N =<br>9 <sup>1</sup> | MDR, N =<br>13 <sup>1</sup> | None, N =<br>62 <sup>1</sup> | p-<br>value <sup>2</sup> | DTR, N =<br>28 <sup>1</sup> | MDR, N =<br>4 <sup>1</sup> | None, N =<br>41 <sup>1</sup> | p-<br>value <sup>2</sup> |

<sup>1</sup>n (%)

<sup>2</sup>Fisher's exact test
